# Supplementary material
Source: PubMed Central journal article supplement (PMC3427219)
Supplement: gmic-3-267-s03.pdf [file gmic-3-267-s03.pdf]

**Supplemental Material to:**

Gil Friedman, Efrat Zlotkin-Rivkin, Michael Donnenberg and Benjamin Aroeti. Retraction of enteropathogenic *E. coli* type IV pili promotes efficient host cell colonization, effector translocation and tight junction disruption. Gut Microbes 2012 3(3);

<http://dx.doi.org/10.4161/gmic.3.3.19814>

<http://www.landesbioscience.com/journals/gutmicrobes/article/19814/>

**Movie 1:** Time lapse imaging of an EPEC microcolony in the absence of arabinose (-arabinose). An MDCK cell monolayer was exposed to EPEC-*bfpF* mutant engineered to express BfpF, and therefore retract its pili, in response to arabinose. Arabinose was not added in this experiment, and the microcolony was continuously imaged every 2 min by DIC microscopy (selected images are shown in Fig. 1A).

**Movie 2:** Time lapse imaging of an EPEC microcolony upon exposure to arabinose (+arabinose). The experiment was performed as in movie 1, except that microcolony attachment to the host cell surface was allowed in the absence of arabinose (-arabinose) and at a given time point (designated T=0), arabinose was added to induce pili retraction (selected images are shown in Fig. 1B).
